# Supplementary material for: Isoforms of Base Excision Repair Enzymes Produced by Alternative Splicing
Source: PubMed Central journal article supplement (PMC6651865; doi:10.3390/ijms20133279), 2019-07-03
Supplement: ijms-20-03279-s001.pdf [file ijms-20-03279-s001.pdf]

## Isoforms of base excision repair enzymes produced by alternative splicing

Elizaveta O. Boldinova<sup>1</sup>, Rafil Khairullin<sup>2</sup>, Alena V. Makarova<sup>1,\*</sup> and Dmitry O. Zharkov<sup>3,4,\*</sup>

<sup>1</sup>RAS Institute of Molecular Genetics, 2 Kurchatova Sq., Moscow 123182, Russia

<sup>2</sup>Institute of Fundamental Medicine and Biology, Kazan (Volga Region), Federal University, 420012 K.Marx, 18 Kazan, Russia

<sup>3</sup>Novosibirsk State University, 1 Pirogova St., Novosibirsk 630090, Russia

<sup>4</sup>SB RAS Institute of Chemical Biology and Fundamental Medicine, 8 Lavrentieva Ave., Novosibirsk 630090, Russia

\* Correspondence: amakarova-img@yandex.ru; Tel. +7-499-1960015 (A.V.M.) and dzharkov@niboch.nsc.ru; Tel. +7-383-3635187 (D.O.Z.)

Supplementary table. Alternative splice isoforms of *POLB* gene

| Alternative splice isoforms             | Premature termination codon | Frameshift | Protein | kDa | References         |
|-----------------------------------------|-----------------------------|------------|---------|-----|--------------------|
| $\Sigma$ ex $\alpha$ (in6)              | -                           | -          | 370     | 42  | 8–10,17, 18        |
| $\Sigma$ ex $\beta$ (in9)               | +                           | +          | 193     |     | 10,17,18           |
| $\Sigma$ ex $\alpha$ ,ex $\beta$        | +                           | +          | 228     |     | 10,17,18           |
| $\Sigma$ ex $\beta$ , part in3          | ND                          | ND         | 96      |     | 18                 |
| $\Sigma$ in11                           | +                           | +          | 350     |     | 13,15,19           |
| $\Sigma$ ex $\alpha$ , $\Delta$ ex2     | +                           | +          | 26      |     | 8,16               |
| $\Sigma$ ex $\beta$ , $\Delta$ ex2      | +                           | +          | 26      |     | 10,18              |
| $\Sigma$ 19bp, $\Delta$ ex2             | +                           | +          | 26      |     | 8                  |
| $\Sigma$ ex $\beta$ , $\Delta$ 2,4-6    | +                           | +          | 26      |     | 10                 |
| $\Sigma$ ex $\alpha$ , $\Delta$ ex11,13 | -                           | -          | 294     |     | 3,5                |
| $\Delta$ part ex1-8                     | +                           | +          | 182     |     | 3                  |
| $\Delta$ ex2                            | +                           | +          | 26      |     | 5,7–10,13,15–19,21 |
| $\Delta$ ex2,3                          | +                           | +          | 28      |     | 10, 17             |
| $\Delta$ ex2,3,11                       | +                           | +          | 28      |     | 10,17,18           |
| $\Delta$ ex2,4                          | +                           | +          | 26      |     | 19                 |
| $\Delta$ ex2,4,5                        | +                           | +          | 26      |     | 8,10,18            |
| $\Delta$ ex2,4-6                        | +                           | +          | 26      |     | 8,10,19            |
| $\Delta$ ex2,4,5,9                      | +                           | +          | 26      |     | 19                 |
| $\Delta$ ex2,part ex 4, ex11            | +                           | +          | 26      |     | 19                 |
| $\Delta$ ex2,4-13                       | +                           | +          | 26      |     | 19                 |
| $\Delta$ ex2,4,5,11                     | +                           | +          | 26      |     | 10                 |
| $\Delta$ ex2,4-6,11                     | +                           | +          | 26      |     | 10,16              |
| $\Delta$ ex2,4-6,12,13                  | +                           | +          | 26      |     | 10                 |
| $\Delta$ ex2,4-11                       | +                           | +          | 26      |     | 16                 |
| $\Delta$ ex2,5                          | +                           | +          | 26      |     | 18                 |
| $\Delta$ ex2,5,6,9                      | +                           | +          | 26      |     | 19                 |
| $\Delta$ ex2-5,13                       | -                           | -          | 164     |     | 18                 |
| $\Delta$ ex2-6                          | ND                          | ND         | 42      |     | 18,19              |

|                               |    |    |     |      |                |
|-------------------------------|----|----|-----|------|----------------|
| $\Delta$ ex2,7,8,9            | +  | +  | 26  |      | 19             |
| $\Delta$ ex2,9                | +  | +  | 26  |      | 16,19          |
| $\Delta$ ex2-9                | ND | ND | 44  |      | 18             |
| $\Delta$ ex2,11               | +  | +  | 26  |      | 10,16,17,18    |
| $\Delta$ ex2,11-13            | +  | +  | 26  |      | 10,17, 18      |
| $\Delta$ ex2,12,13            | +  | +  | 26  |      | 10,18          |
| $\Delta$ ex2,13               | +  | +  | 26  |      | 18             |
| $\Delta$ ex2-13               | -  | -  | 51  |      | 10,17, 19      |
| $\Delta$ ex3-5                | ND | ND | 268 |      | 18             |
| $\Delta$ ex3-6,10,11          | ND | ND | 44  |      | 10             |
| $\Delta$ ex3-6,11-13          | ND | ND | 44  |      | 10             |
| $\Delta$ ex3-6,9,11           | ND | ND | 46  |      | 16             |
| $\Delta$ ex3-9,12,13          | ND | ND | 45  |      | 10             |
| $\Delta$ ex4                  | -  | +  | 310 |      | 10,17,18,19    |
| $\Delta$ ex4,5                | +  | +  | 96  |      | 8,10,17,19     |
| $\Delta$ ex4-6                | +  | +  | 70  |      | 8, 19          |
| $\Delta$ ex4,5,12,13          | +  | +  | 71  |      | 18             |
| $\Delta$ ex4-6,11-13          | +  | +  | 71  |      | 11             |
| $\Delta$ ex4-9,11-13          | ND | ND | 118 |      | 5              |
| $\Delta$ ex4-10               | -  | -  | 190 |      | 10,17,18       |
| $\Delta$ ex4-11               | -  | -  | 161 |      | 10,17,18       |
| $\Delta$ ex4-11,13            | -  | -  | 93  |      | 10, 17         |
| $\Delta$ ex4-13               | -  | -  | 93  |      | 10,17, 18      |
| $\Delta$ ex7,8                | ND | ND | 128 |      | 19             |
| $\Delta$ part ex10-part ex13  | ND | ND | ND  |      | 20             |
| $\Delta$ ex11                 | -  | -  | 306 | 36   | 1-6,9,10,13-23 |
| $\Delta$ part ex 11           | ND | ND | ND  |      | 20             |
| $\Delta$ ex11-13              | -  | +  | 261 | 26,5 | 10,12,17,18,21 |
| $\Delta$ ex12,13              | -  | -  | 290 |      | 10,17,18       |
| $\Delta$ part ex12-part ex 13 | ND | ND | ND  |      | 20             |
| $\Delta$ ex13                 | -  | -  | 267 |      | 18             |
| $\Delta$ ex14                 | -  | -  | 298 |      | 5              |

ND – no data

## References

1. Bhattacharyya, N.; Banerjee, S. A variant of DNA polymerase  $\beta$  acts as a dominant negative mutant. *Proc Natl Acad Sci U S A*. 1997, 94(19), 10324–10329.
2. Bhattacharyya, N.; Chen, H.-C.; Grundfest-Broniatowski, S.; Banerjee, S. Alteration of hMSH2 and DNA Polymerase  $\beta$  Genes in Breast Carcinomas and Fibroadenomas. *Biochemical and Biophysical Research Communications*. 1999, 259(2), 429 – 435.
3. Bhattacharyya, N.; Chen, H.-C.; Comhair, S.; Erzurum, S.; Banerjee, S. Variant Forms of DNA Polymerase  $\beta$  in Primary Lung Carcinomas. *Dna Cell Biol*. 1999, 18, 549 – 554.
4. Bhattacharyya, N.; Banerjee, S. A Novel Role of XRCC1 in the Functions of a DNA Polymerase  $\beta$  Variant. *Biochemistry*. 2001, 40(30), 9005 – 9013.

5. Bhattacharyya, N.; Chen, H.-C.; Wang, L.; Banerjee, S. Heterogeneity in Expression of DNA Polymerase  $\beta$  and DNA Repair Activity in Human Tumor Cell Lines. *Gene Expr.* 2002, 10(3), 115 – 123.
6. Bhattacharyya, N.; Banerjee, T.; Patel, U.; Banerjee, S. Impaired repair activity of a truncated DNA polymerase  $\beta$  protein. *Life Sci.* 2001, 69(3), 271 – 280.
7. Chyan Y.-J.; Ackerman, S.; Shepherd, N. S.; McBride, O. W.; Widen, S. G.; Wilson, S. H.; Wood, T.G. The human DNA polymerase B gene structure. Evidence of alternative splicing in gene expression. *Nucleic Acids Res.* 1994, 22(14), 2719 – 2725.
8. Chyan Y.-J.; Strauss, P.R.; Wood, T.G.; Wilson, S.H. Identification of Novel mRNA Isoforms for Human DNA Polymerase  $\beta$ . *DNA Cell Biol.* 1996, 8, 653 – 659.
9. Chen H.-C.; Bhattacharyya, N.; Wang, L.; Recupero, A. J.; Klein, E. A.; Harter, M. L.; Banerjee, S. Defective DNA repair genes in a primary culture of human renal cell carcinoma. *J Cancer Res Clin Oncol.* 2000, 126(4), 185 – 190.
10. Disher, K.; Skandalis, A. Evidence of the modulation of mRNA splicing fidelity in humans by oxidative stress and p53. *Genome.* 2007, 50(10), 946 – 953.
11. Kalyani, K.; Bhattacharya, C.; Bhattacharyya, N. Association of a Newly Identified Variant of DNA Polymerase Beta (pol $\beta$  $\Delta$ 63-123, 208-304) with the Risk Factor of Ovarian Carcinoma in India. *Asian Pac J Cancer Prev.* 2012, 13(5), 1999 – 2002.
12. Kalyani, K.; Chakraborty, A.; Bhattacharyya, N. HeLa Cells Containing a Truncated Form of DNA Polymerase Beta are More Sensitized to Alkylating Agents than to Agents Inducing Oxidative Stress. *Asian Pac J Cancer Prev.* 2015, 16(18), 8177 – 8186.
13. Nowak, R.; Bieganski, P.; Konopinski, R.; Siedlecki, J. A. Alternative Splicing of DNA Polymerase  $\beta$  mRNA is not Tumor-Specific. *Int J Cancer.* 1996, 68(2), 199 – 202.
14. Kakali, P.; Kalyani, K.; Bhattacharyya, N. Identification of an Endoplasmic Reticulum Membrane Protein Interacting with DNA Polymerase Beta by a Yeast Two-Hybrid Screen. *Z Naturforsch C.* 2014, 69(1-2), 81 – 88.
15. Sadakane, Y.; Maeda, K.; Kuroda, Y.; Hori, K. Identification of mutations in DNA polymerase  $\beta$  mRNAs from patients with Werner syndrome. *Biochem Biophys Res Commun.* 1994, 200(1), 219 – 225.
16. Simonelli, V.; D'Errico, M.; Palli, D.; Prasad, R.; Wilson, S.H.; Dogliotti E. Characterization of DNA polymerase  $\beta$  splicing variants in gastric cancer: the most frequent exon 2-deleted isoform is a non-coding RNA. *Mutat Res.* 2009, 670(1-2), 79 – 87.
17. Skandalis, A.; Uribe E. A survey of splice variants of the human hypoxanthinephosphoribosyl transferase and DNA polymerase beta genes: products of alternative or aberrant splicing? *Nucleic Acids Res.* 2004, 32(22), 6557 – 6564.
18. Skandalis, A.; Frampton, M.; Seger, J.; Richards M.H. The adaptive significance of unproductive alternative splicing in primates. *RNA.* 2010, 16(10), 2014 – 2022.
19. Thompson, T.E.; Rogan, P.K.; Risinger, J. I.; Taylor J. A. Splice Variants but not Mutations of DNA Polymerase  $\beta$  Are Common in Bladder Cancer. *Cancer Res.* 2002, 62(11), 3251 – 3256.
20. Wang, L.; Patel, U.; Ghosh, L.; Banerjee, S. DNA Polymerase  $\beta$  Mutations in Human Colorectal Cancer. *Cancer Res.* 1992, 52(17), 4824 – 4827.
21. Wang, L.; Banerjee, S. Mutations in DNA polymerase  $\beta$  occur in breast, prostate and colorectal tumors. *Int J Oncol.* 1995, 6(2), 459 – 463.

22. Wang, L.; Bhattacharyya, N.; Chelsea, D. M.; Escobar, P. F.; Banerjee, S. A Novel Nuclear Protein, MGC5306 Interacts with DNA Polymerase  $\beta$  and Has a Potential Role in Cellular Phenotype. *Cancer Res.* 2004, 64(21), 7673 – 7677.
23. Wang, L.; Bhattacharyya, N.; Thangaiyan, R.; Wang, L.; Banerjee, S. Mammary carcinogenesis in transgenic mice expressing a dominant-negative mutant of DNA polymerase  $\beta$  in their mammary glands. *Carcinogenesis.* 2007, 28(6), 1356 – 1363.
